# Supplementary material
Source: PubMed Central journal article supplement (PMC6157023)
Supplement: NIHMS988625-supplement-SI.pdf [file NIHMS988625-supplement-SI.pdf]

## **Supporting Information**

### **Atomically-precise Au<sub>25</sub>(SG)<sub>18</sub> nanoclusters: Rapid single-step synthesis and application in photothermal therapy**

*Sai Krishna Katla,<sup>a</sup> Jie Zhang,<sup>a</sup> Edison Castro,<sup>a</sup> Ricardo A. Bernal,<sup>a</sup> and XiuJun Li<sup>\*,a,b,c,d</sup>*

*<sup>a</sup>Department of Chemistry, University of Texas at El Paso, 500 West University Ave, El Paso, Texas 79968, United States.*

*<sup>b</sup>Biomedical Engineering, University of Texas at El Paso, 500 West University Ave, El Paso, Texas 79968, United States.*

*<sup>c</sup>Border Biomedical Research Center, University of Texas at El Paso, 500 West University Ave, El Paso, Texas 79968, United States.*

*<sup>d</sup>Environmental Science and Engineering, University of Texas at El Paso, 500 West University Ave, El Paso, Texas 79968, United States.*

*Corresponding author e-mail: [xli4@utep.edu](mailto:xli4@utep.edu)*

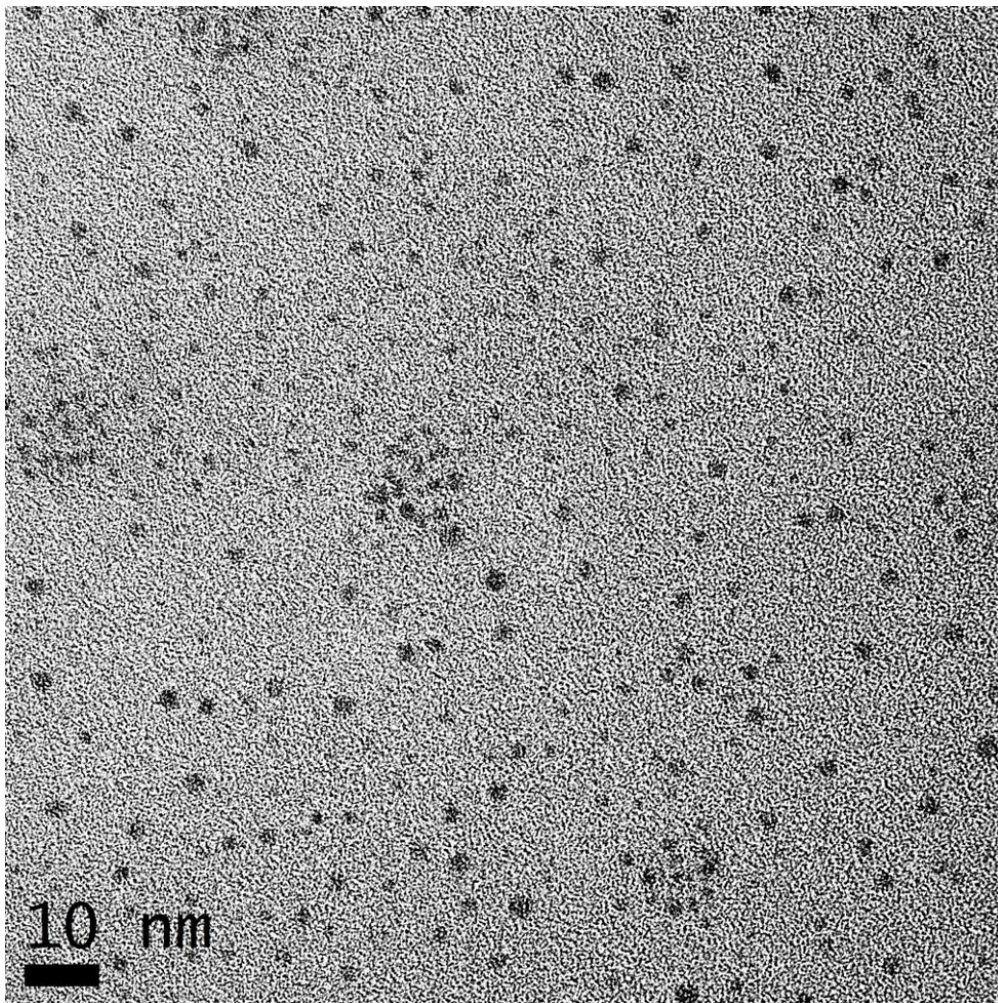

**Figure S1.** TEM image of the  $\text{Au}_{25}(\text{SG})_{18}$  synthesized at room temperature for 24 h showing nanoclusters of  $\sim 2$  nm.

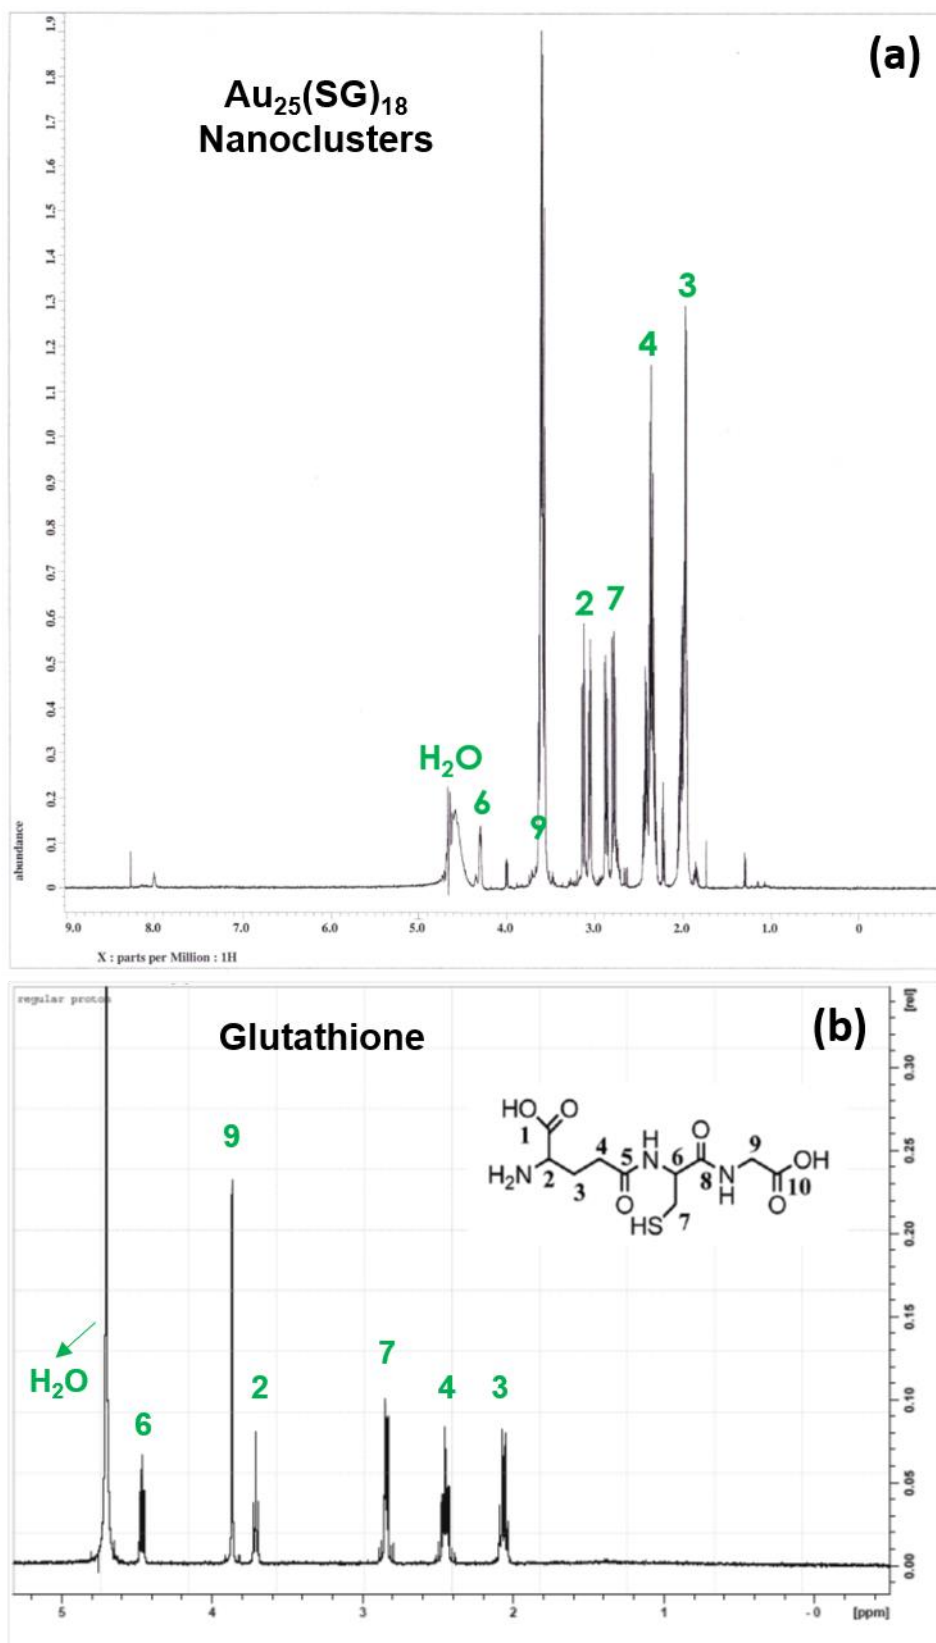

**Figure S2.**  $^1\text{H}$  NMR spectrum of (a) the  $\text{Au}_{25}(\text{SG})_{18}$  nanoclusters synthesized at room temperature for 24 h and (b) pure glutathione molecules. The characteristic  $^1\text{H}$  NMR peaks for glutathione are numbered on the structure of glutathione (inset).

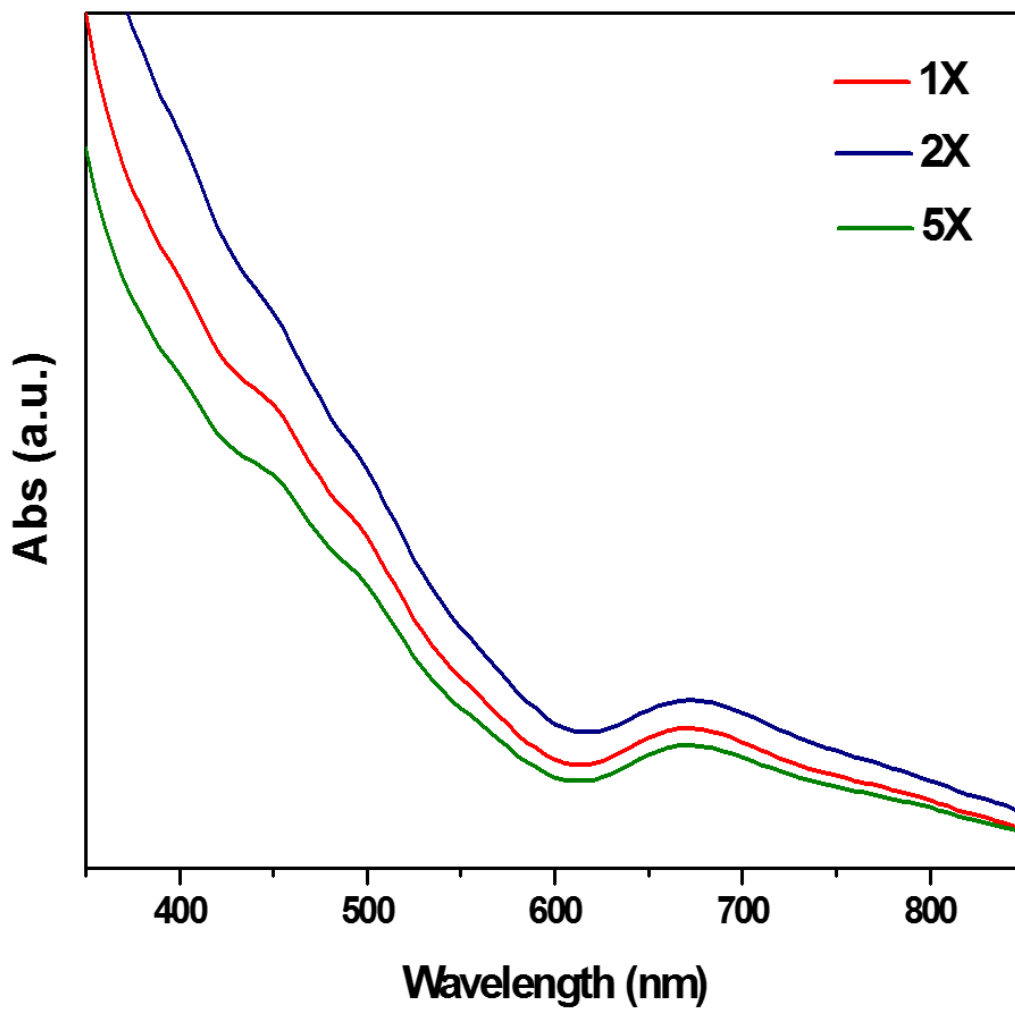

**Figure S3.** UV-Visible absorption spectra of the Au<sub>25</sub>(SG)<sub>18</sub> nanoclusters synthesized at room temperature for 24 h using different volumes of reactants (1X, 2X, and 5X times the original volume).

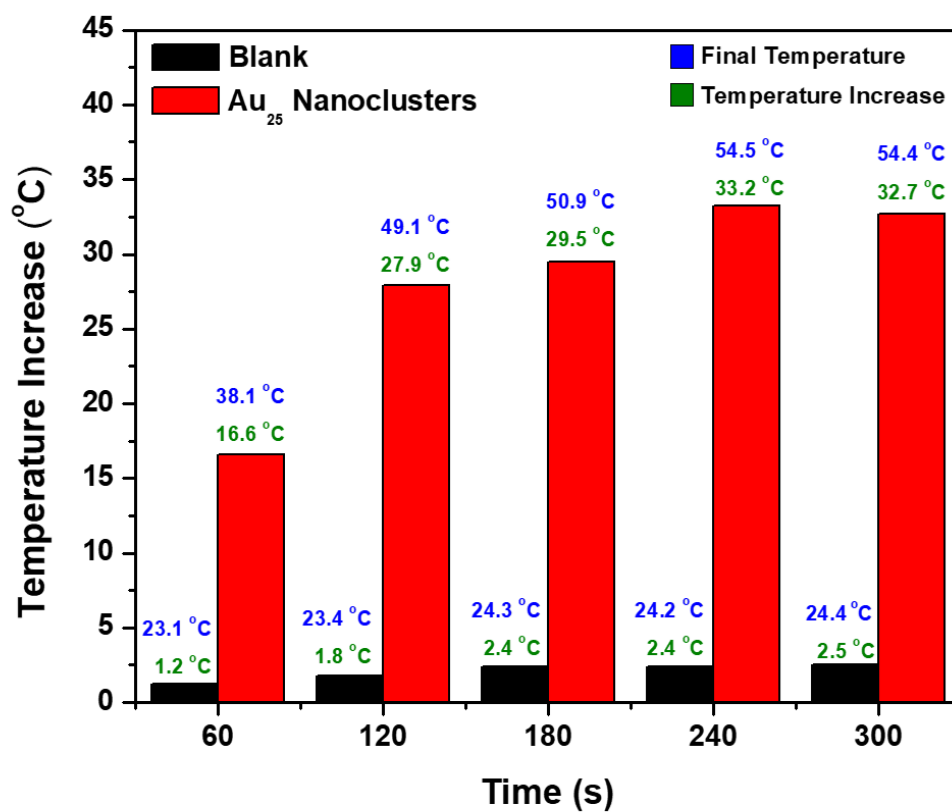

**Figure S4.** The PTT effect of Au<sub>25</sub>(SG)<sub>18</sub> nanoclusters studied at different times.

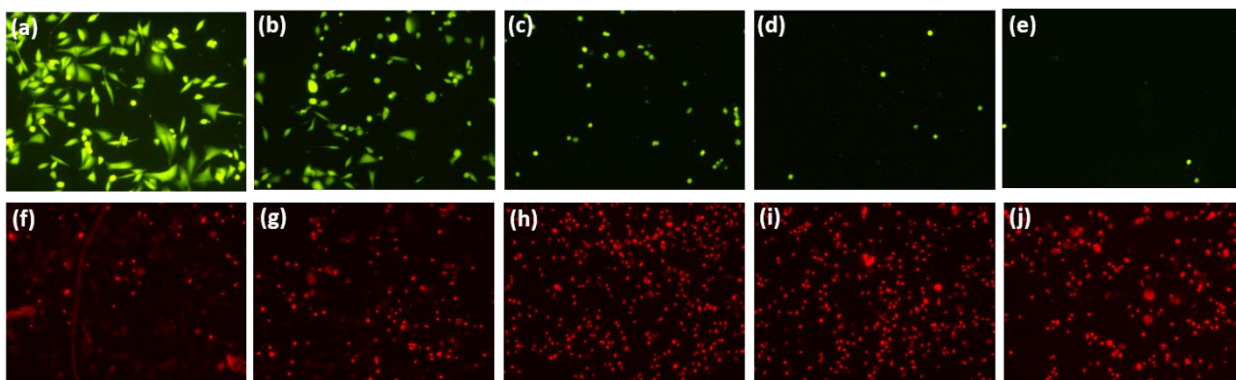

**Figure S5.** MDA-MB-231 cells stained with (a-e) Calcein-AM and (f-j) EthD-1 after laser irradiation (power =  $8.75 \text{ W/cm}^2$ ) for a time duration of 1 min to 5 min, respectively.

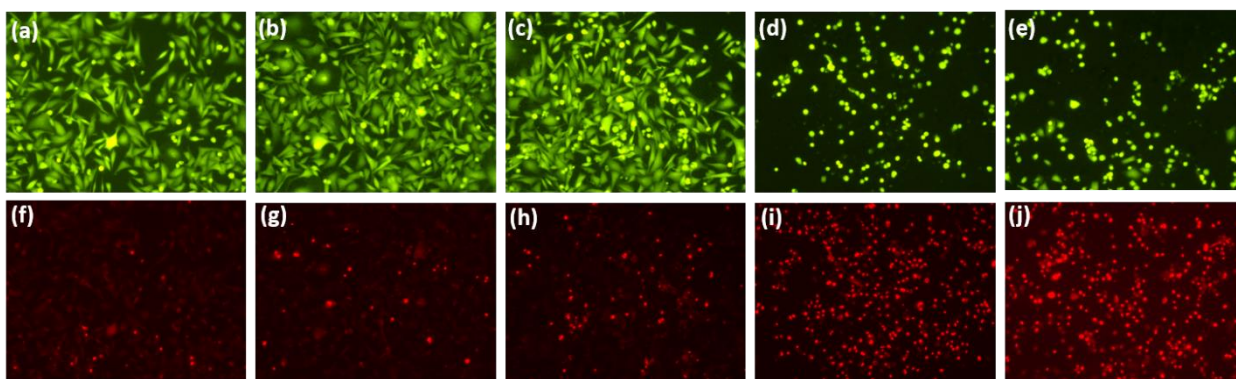

**Figure S6.** MDA-MB-231 cells stained with (a-e) Calcein-AM and (f-j) EthD-1 after laser irradiation (power =  $7.5 \text{ W/cm}^2$ ) for a time duration of 1 min to 5 min, respectively.

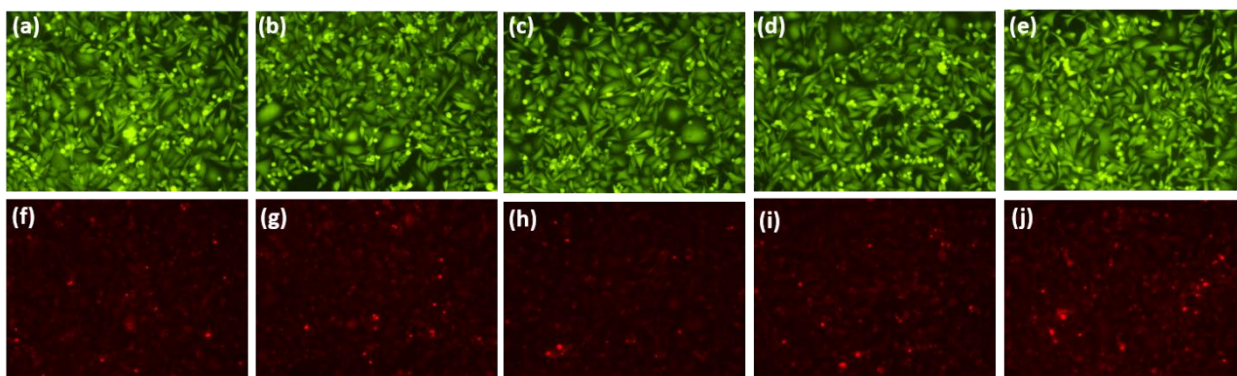

**Figure S7.** MDA-MB-231 cells stained with (a-e) Calcein-AM and (f-j) EthD-1 after laser irradiation (power =  $6.25 \text{ W/cm}^2$ ) for a time duration of 1 min to 5 min, respectively.



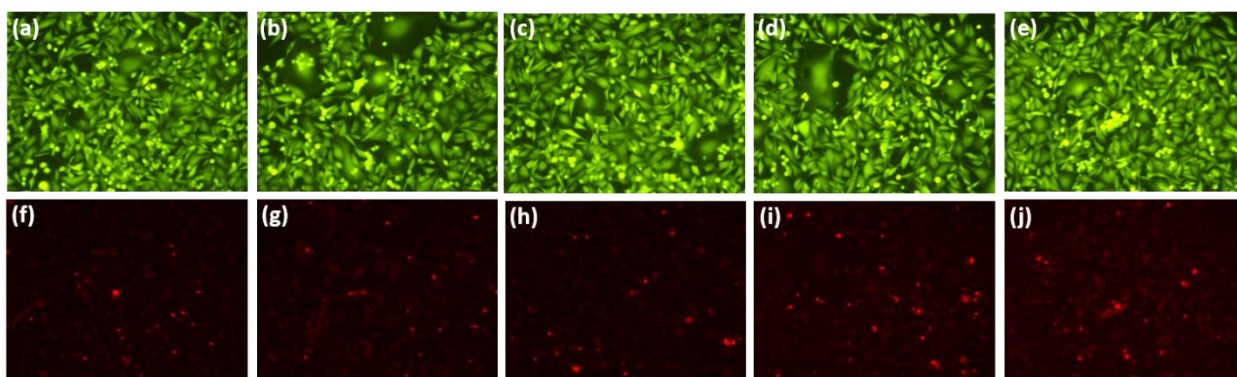

**Figure S8.** MDA-MB-231 cells stained with (a-e) Calcein-AM and (f-j) EthD-1 after laser irradiation (power = 5 W/cm<sup>2</sup>) for a time duration of 1 min to 5 min, respectively.

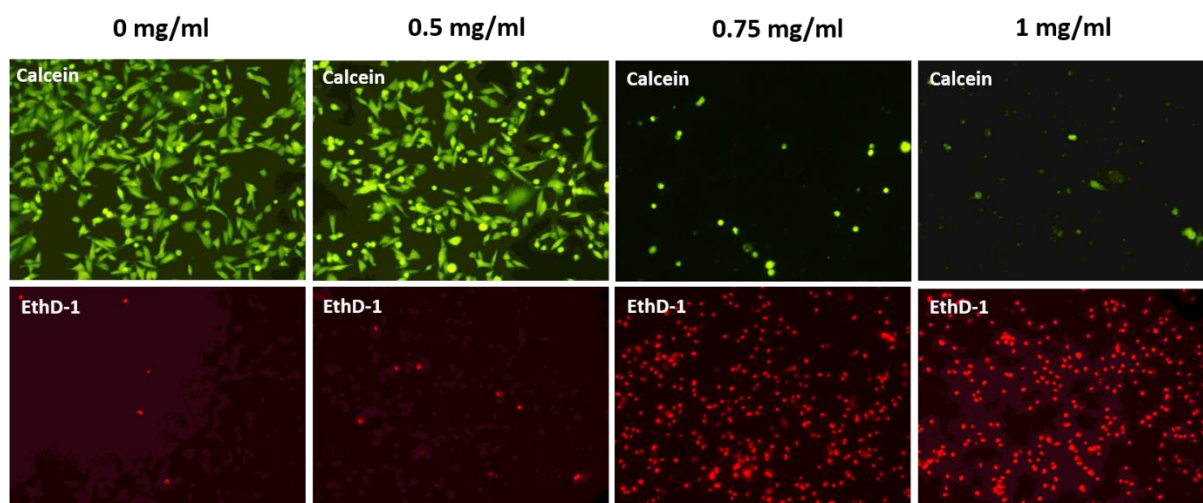

**Figure S9.** Cell viability study performed at different concentrations of the  $\text{Au}_{25}(\text{SG})_{18}$  nanoclusters using a laser intensity of  $10 \text{ W/cm}^2$  for 2 min.

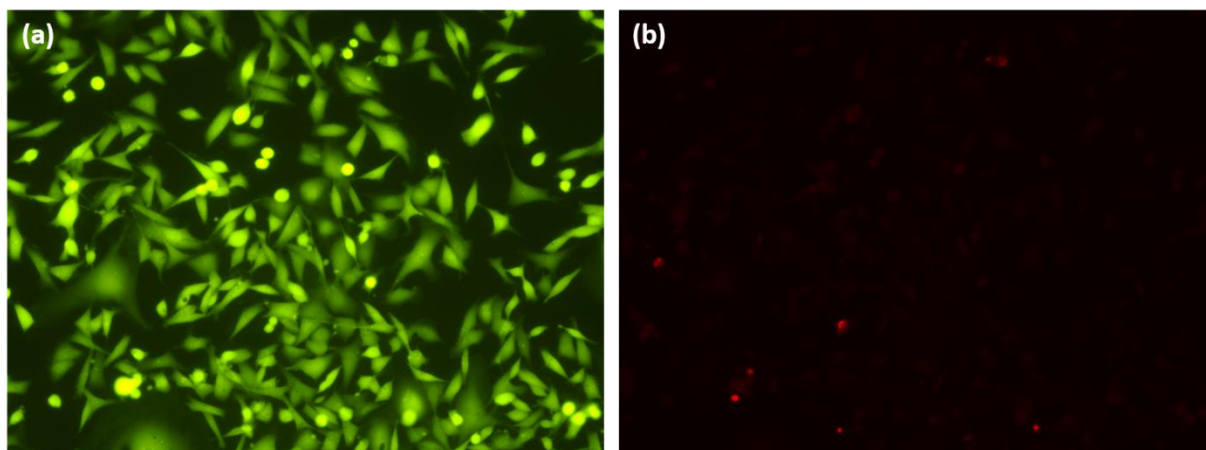

**Figure S10.** (a) Calcein-AM and (b) EthD-1 stained MDA-MB-231 cells without the presence of nanoclusters and after irradiation with a laser power of  $10 \text{ W/cm}^2$  for 5 min, respectively.
